# Supplementary material for: Halide-ion-templated Ag8Cu6 rhombic dodecahedrons: synthesis, structure and reactivity of [Ag8Cu6(CCtBu)12X]BF4 (X = Cl, Br)
Source: Royal Society of Chemistry journal article supplement (doi:10.1039/c3dt33027c), 2013-01-01

SUPPORTING INFORMATION

***Halide-Ion-Templated  $\text{Ag}_8\text{Cu}_6$  Rhombic Dodecahedrons: Synthesis, Structure and Reactivity of  $[\text{Ag}_8\text{Cu}_6(\text{C}\equiv\text{CtBu})_{12}\text{X}]\text{BF}_4$  ( $\text{X} = \text{Cl}, \text{Br}$ )***

*Timothy Connell,<sup>‡a</sup> Saman Sandanayake,<sup>‡a</sup> George N. Khairallah,<sup>a</sup> Jonathan M. White,<sup>a</sup> Richard A.J. O'Hair,<sup>\*a</sup> Paul S. Donnelly<sup>\*a</sup> and Spencer J. Williams<sup>\*a</sup>*

***Table of contents***

|                                                                                                                                    |       |    |
|------------------------------------------------------------------------------------------------------------------------------------|-------|----|
| <b>Fig S1.</b> ORTEP plot of cation of $[\text{Ag}_8\text{Cu}_6(\text{C}\equiv\text{CtBu})_{12}\text{Cl}]\text{BF}_4$ ( <b>2</b> ) | ..... | S2 |
| <b>Fig S2.</b> ORTEP plot of cation of $[\text{Ag}_8\text{Cu}_6(\text{C}\equiv\text{CtBu})_{12}\text{Br}]\text{BF}_4$ ( <b>4</b> ) | ..... | S3 |
| <b>Fig S3.</b> Normalized emission spectra of clusters <b>1</b> and <b>2</b>                                                       | ..... | S4 |
| <b>Fig S4.</b> $^1\text{H}$ NMR spectrum of 1-benzyl-4- <i>tert</i> -butyl-1,2,3-triazole ( <b>5</b> )                             | ..... | S5 |

**Fig S1.** ORTEP plot of cation of  $[\text{Ag}_8\text{Cu}_6(\text{C}\equiv\text{CtBu})_{12}\text{Cl}]\text{BF}_4$  (**2**). Thermal ellipsoids are at 20% probability.

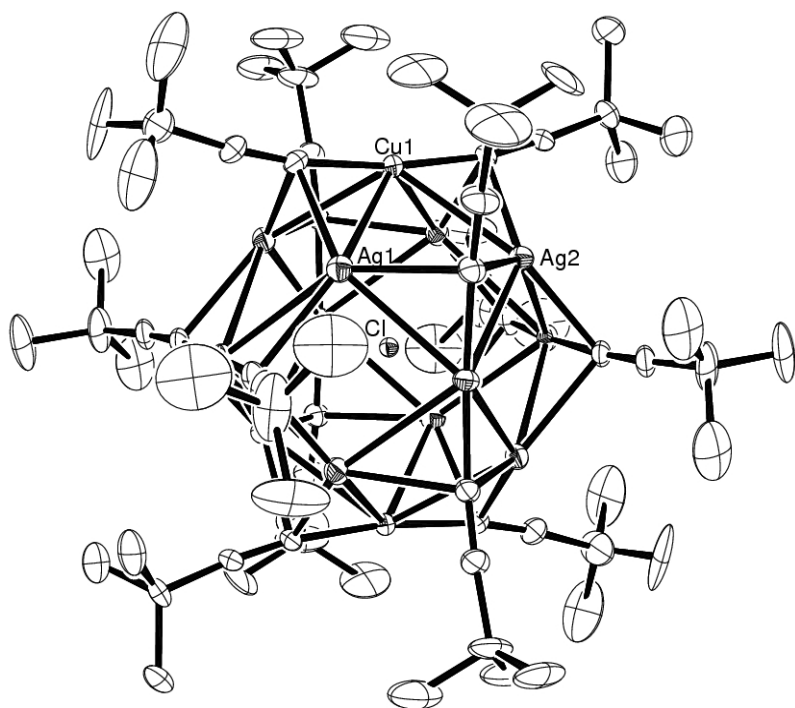

ORTEP plot showing asymmetric unit of cation of  $[\text{Ag}_8\text{Cu}_6(\text{C}\equiv\text{CtBu})_{12}\text{Cl}]\text{BF}_4$  (**2**). Thermal ellipsoids are at 20% probability.

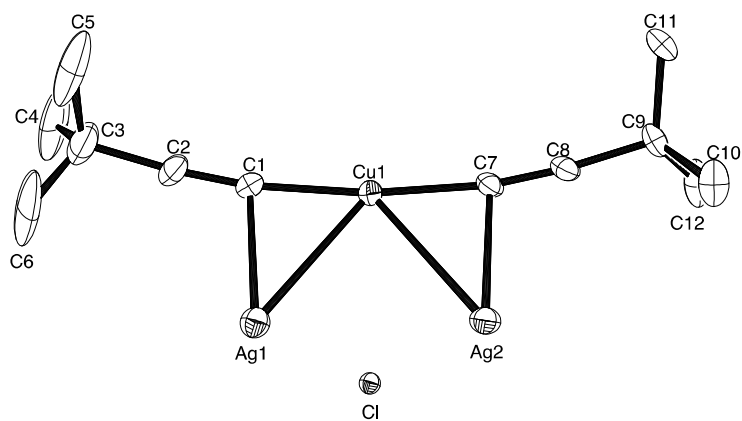

**Fig S2.** ORTEP plot of cation of  $[\text{Ag}_8\text{Cu}_6(\text{C}\equiv\text{CtBu})_{12}\text{Br}]\text{BF}_4$  (**4**). Thermal ellipsoids are at 20% probability.

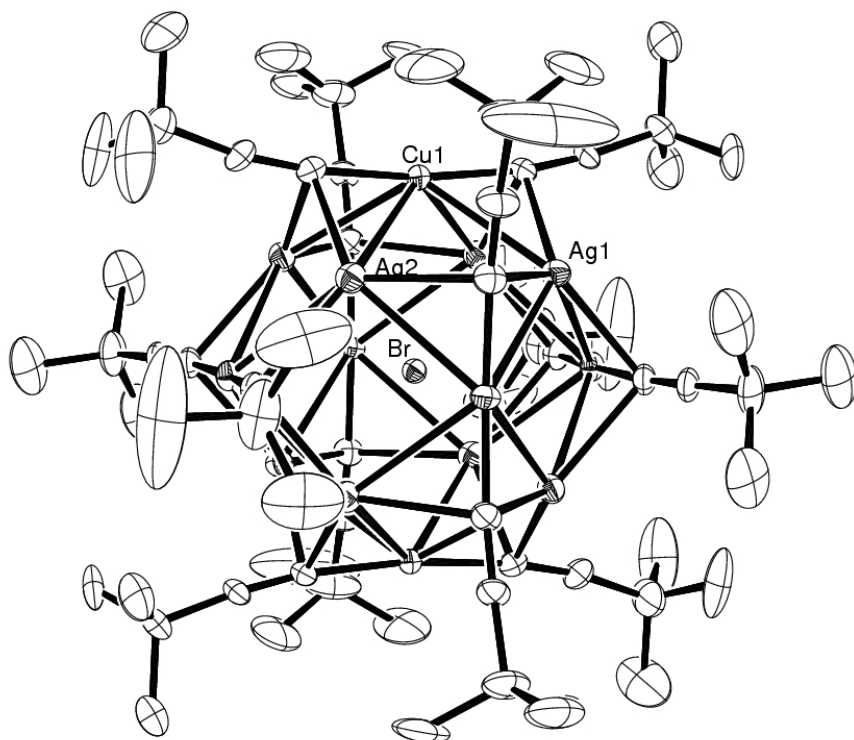

ORTEP plot showing asymmetric unit of cation of  $[\text{Ag}_8\text{Cu}_6(\text{C}\equiv\text{CtBu})_{12}\text{Br}]\text{BF}_4$  (**4**). Thermal ellipsoids are at 20% probability.

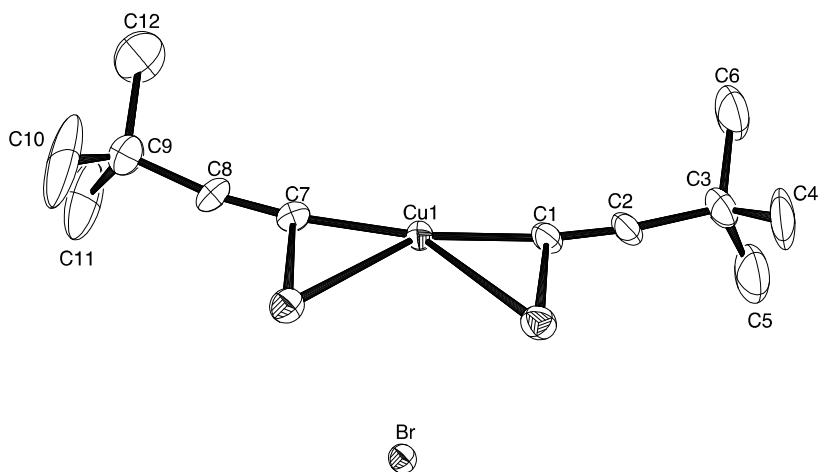

**Fig S3.** Normalized emission spectra of 50  $\mu\text{M}$  solutions of  $\text{Cl@Ag}_{14}$  cluster **1** (blue) and  $\text{Cl@Ag}_8\text{Cu}_6$  cluster **2** (red) in dichloromethane. Samples were irradiated at 283 nm. Spectra were measured on a Varian CARY Eclipse fluorescence spectrophotometer in capped quartz cuvettes.

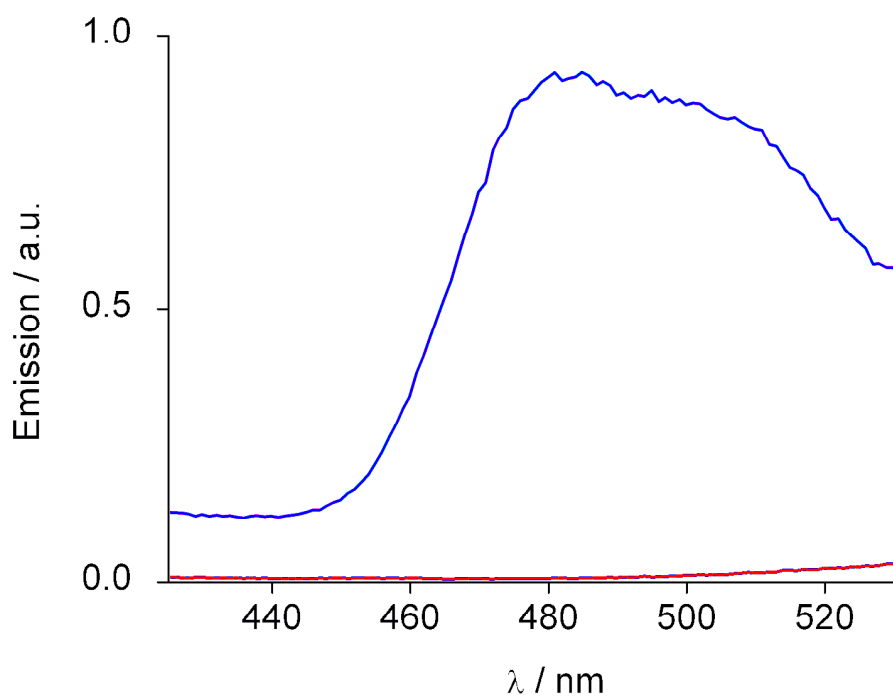

**Fig S4.** 500 MHz  $^1\text{H}$  NMR spectrum of 1-benzyl-4-*tert*-butyl-1,2,3-triazole in  $\text{CDCl}_3$  (**5**).

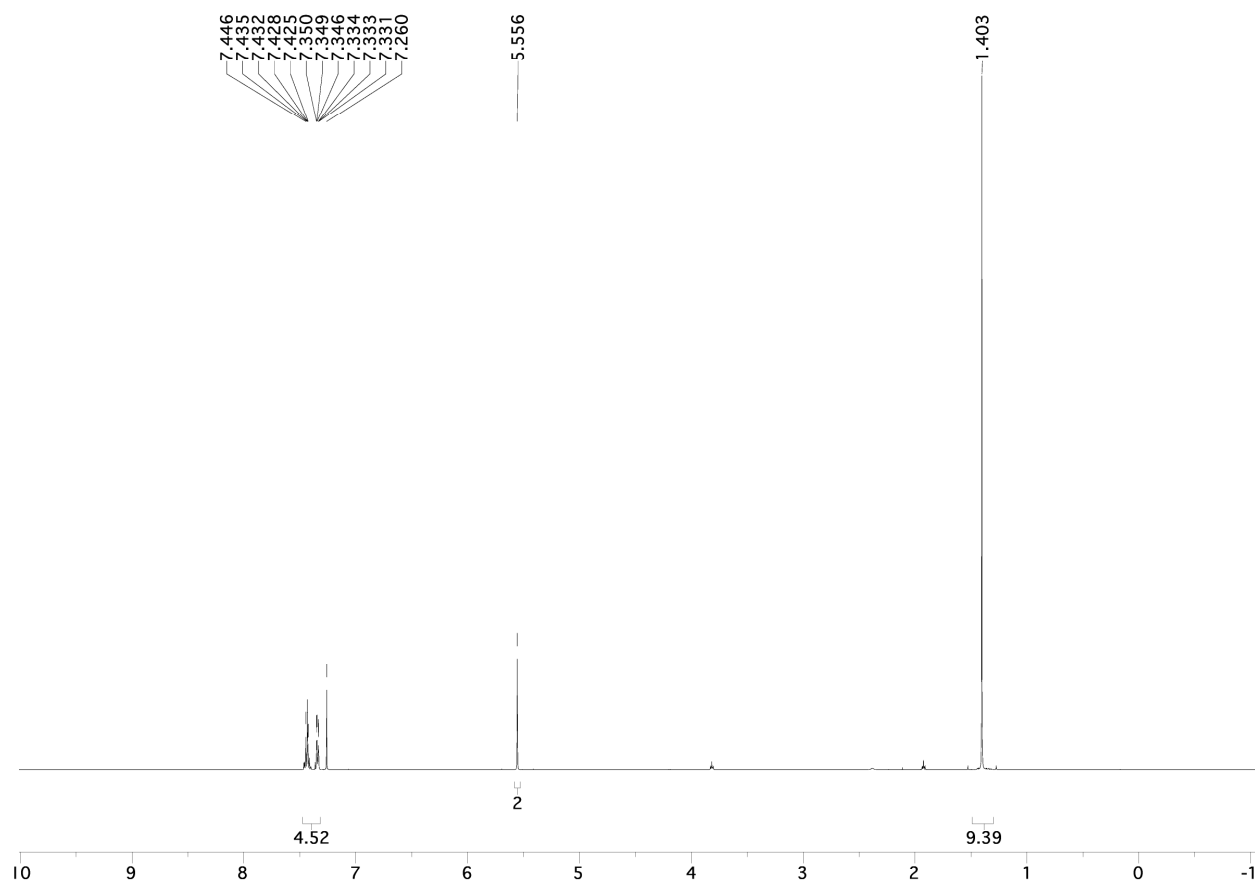

Supplement: c3dt33027c.pdf [file c3dt33027c.pdf]
